# Supplementary material for: AmBisome® Formulations for Pediatrics: Stability, Cytotoxicity, and Cost-Effectiveness Studies
Source: MDPI journal article supplement (doi:10.3390/pharmaceutics16040466), 2024-03-27
Supplement: s1 [file s1]

## Supplementary information

# AmBisome<sup>®</sup> Formulations for Pediatrics: Stability, Cytotoxicity, and Cost-Effectiveness Studies

Guendalina Zuccari <sup>1,\*</sup>, Carla Villa <sup>1</sup>, Valentina Iurilli <sup>2</sup>, Paola Barabino <sup>2</sup>, Alessia Zorzoli <sup>3</sup>, Danilo Marimpietri <sup>3</sup>, Debora Caviglia <sup>1</sup> and Eleonora Russo <sup>1,\*</sup>

<sup>1</sup> Department of Pharmacy, University of Genoa, Viale Benedetto XV, 16132 Genoa, Italy; carla.villa@unige.it (C.V.); debora.caviglia@edu.unige.it (D.C.)

<sup>2</sup> UOC—Unità Operativa Complessa, IRCCS Istituto Giannina Gaslini, via Gerolamo Gaslini 5, 16147 Genoa, Italy; valentinaiurilli@gaslini.org (V.I.); paolabarabino@gaslini.org (P.B.)

<sup>3</sup> Stem Cell Laboratory and Cell Therapy Center, IRCCS Istituto Giannina Gaslini, via Gerolamo Gaslini 5, 16147 Genoa, Italy; alessiazorzoli@gaslini.org (A.Z.); danilomarimpietri@gaslini.org (D.M.)

\* Correspondence: guendalina.zuccari@unige.it (G.Z.); eleonora.russo@unige.it (E.R.)

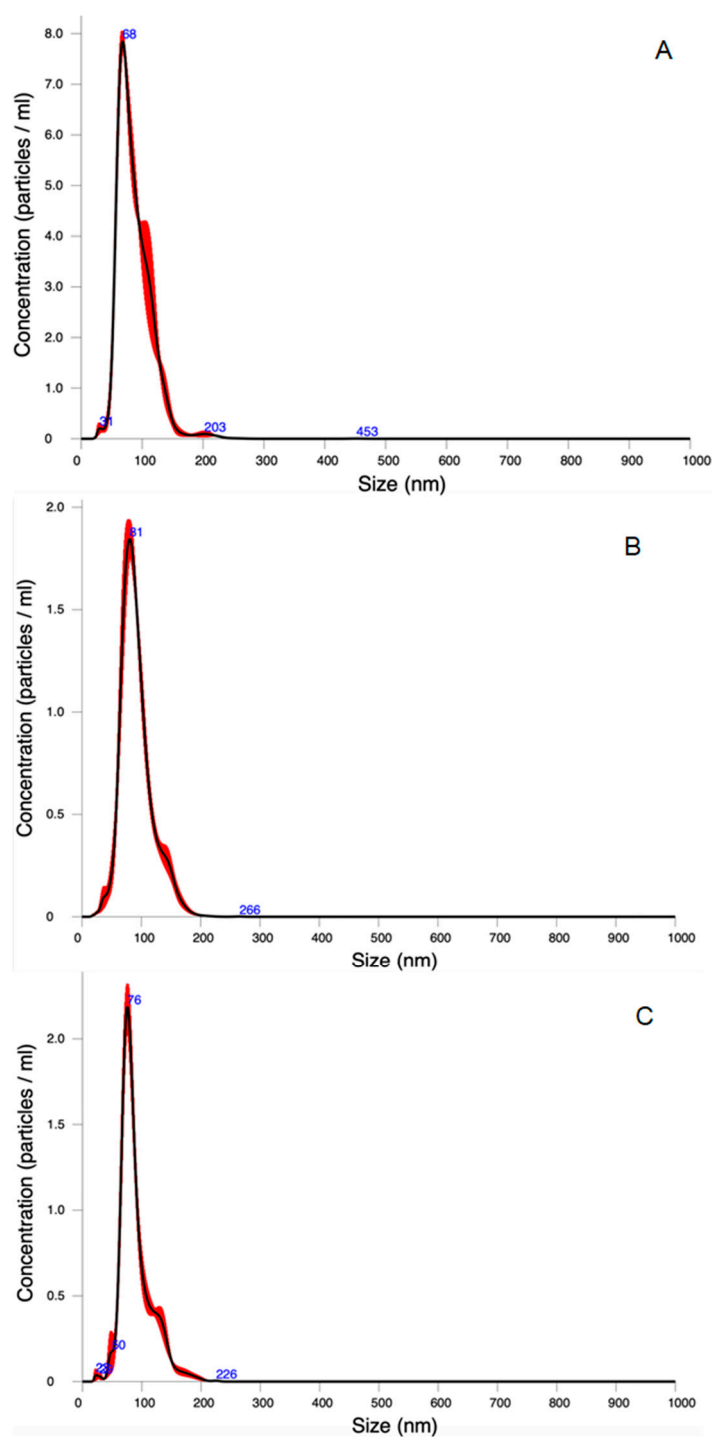

**Figure S1.** Representative size distribution obtained by NTA system of freshly prepared liposomal formulations: (A) 4.0 mg/mL AmB in sterile water, (B) 0.2 mg/mL and (C) 2.0 mg/mL AmB in 5% glucose solution.

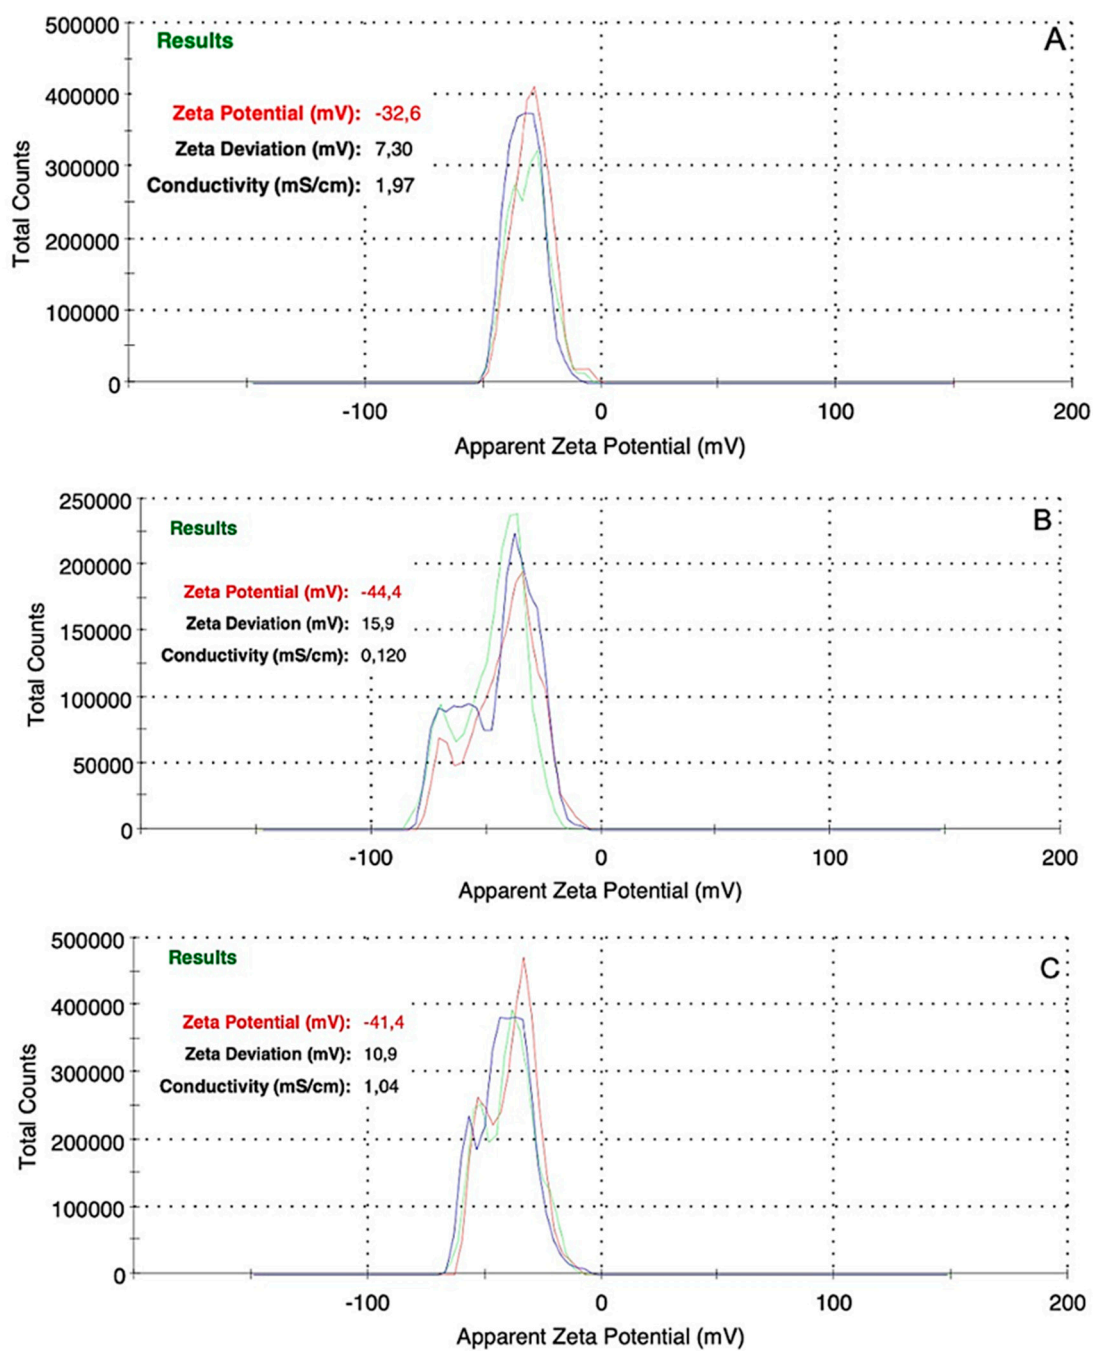

**Figure S2.** Representative distribution of zeta potentials of freshly prepared liposomal formulations: (A) 4.0 mg/mL AmB in sterile water, (B) 0.2 mg/mL and (C) 2.0 mg/mL AmB in 5% glucose solution.

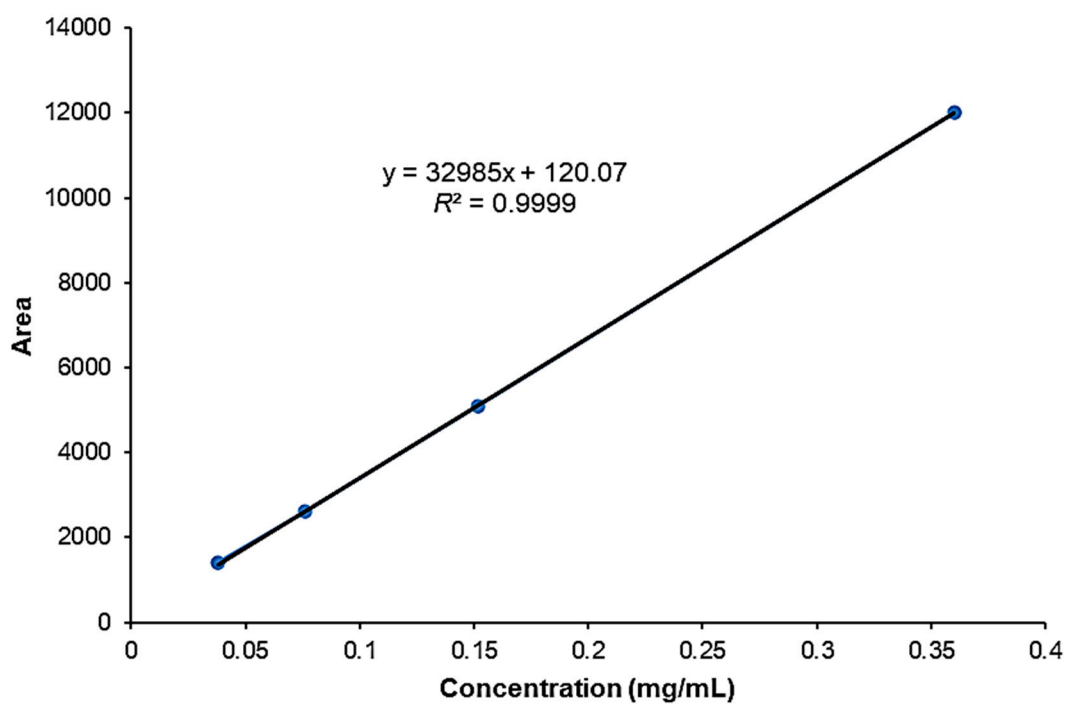

**Figure S3.** Calibration curve of the HPLC assay method. Calibration standards are 0.038, 0.076, 0.152, 0.36 mg/mL of AmB in methanol solution.

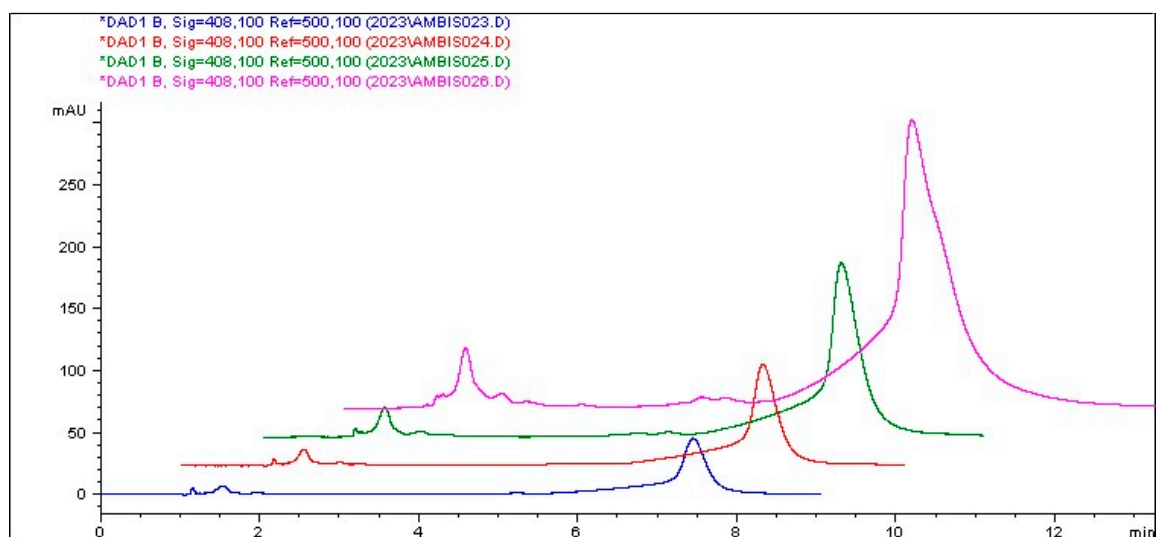

**Figure S4.** Chromatograms of the AmB calibration standard methanol solutions: 0.038 (blue line), 0.076 (red line), 0.152 (green line), 0.36 (pink line) mg/mL.
